# Supplementary material for: Statin Use and Risk of Vascular Events Among Cancer Patients After Radiotherapy to the Thorax, Head, and Neck
Source: PubMed Central journal article supplement — J Am Heart Assoc. 2019 Jun 19;8(13):e005996. doi: 10.1161/JAHA.117.005996 (PMC6662340; doi:10.1161/jaha.117.005996), 2019-06-19
Supplement: JAH3-8-e005996-s001.pdf [file JAH3-8-e005996-s001.pdf]

# **Supplemental Material**

**Table S1. Definitions of covariates-Interventions.**

| Covariates          | ICD-9 codes          | ICD-10 codes         | CCI        | Intervention CCP | Code d'Acte (Act Code)                                                                                                                                  |
|---------------------|----------------------|----------------------|------------|------------------|---------------------------------------------------------------------------------------------------------------------------------------------------------|
| <b>Radiotherapy</b> | V580<br>V661<br>V671 | Z510<br>Z541<br>Z081 | 1.xx.27.xx | 0639             | 8510,8511,8507,8508,8553,8509,9477,200,8518,8519,8520,8554,7648,8516,746,635,8564,8565,9150,9162,9134,9144,9152,9164,9141,9146,9160,9170,9168,9143,8504 |
| <b>Chemotherapy</b> | V66.2<br>V67.2       | Z54.2<br>Z08.2       |            | 13.55            | 583,603, 734,94,95,15012,15013,470,472,475,476,7000,15272,15403,15699,15702                                                                             |

CCI: Canadian Classification of Health Interventions, CCP: Canadian Classification of Diagnostic, Therapeutic and Surgical Procedures

**Table S2. Definitions of covariates-Comorbidities and Outcomes.**

| Covariates                     | ICD-9 codes | Disease                                                                                                           | ICD-10 codes |
|--------------------------------|-------------|-------------------------------------------------------------------------------------------------------------------|--------------|
| <b>Atrial Fibrillation</b>     | 427.31      | Atrial fibrillation                                                                                               | 148.0        |
| <b>Hypertension</b>            | 401.x       | Essential hypertension                                                                                            | I10.x        |
| <b>Diabetes (DM)</b>           | 250.x       | Diabetes mellitus                                                                                                 |              |
|                                |             | Type I DM                                                                                                         | E09.x        |
|                                |             | Type II DM                                                                                                        | E10.x        |
|                                |             | Malnutrition-related DM                                                                                           | E11.x        |
|                                |             | Other specified diabetes mellitus                                                                                 | E12.x        |
|                                |             | Unspecified diabetes mellitus                                                                                     | E13.x        |
|                                |             |                                                                                                                   | E14.x        |
| <b>Dyslipidemia</b>            | 272.0       | Pure hypercholesterolemia                                                                                         | E78.x        |
| <b>Coronary artery disease</b> | 414.0X      | Coronary atherosclerosis                                                                                          | I25.1x       |
|                                | 414.2X      | Chronic total occlusion of coronary artery                                                                        |              |
|                                | 414.3X      | Coronary atherosclerosis due to lipid rich plaque                                                                 |              |
|                                | 414.8X      | Other specified forms of chronic ischemic heart disease                                                           |              |
|                                | 414.9X      | Chronic ischemic heart disease, unspecified                                                                       | I25.9x       |
|                                |             | Atherosclerosis of coronary artery bypass graft(s) and coronary artery of transplanted heart with angina pectoris | I25.7x       |
|                                |             | Other forms of chronic ischemic heart disease                                                                     | I25.8x       |
| <b>Myocardial infarct</b>      | 410.x       | Acute myocardial infarction                                                                                       |              |
|                                |             | ST elevation (STEMI) and non-ST elevation (NSTEMI) myocardial infarction                                          | I21.x        |
|                                |             | Subsequent ST elevation (STEMI) and non-ST elevation (NSTEMI) myocardial infarction                               | I22.x        |
|                                | 411         | Other acute and subacute of ischemic heart disease                                                                | I24          |
| <b>Heart failure</b>           | 428.0       | Heart failure, unspecified                                                                                        |              |
|                                | 428.1       | Left heart failure                                                                                                | 150.1        |
|                                | 428.2x      | Systolic heart failure                                                                                            | 150.2x       |
|                                | 428.3x      | Diastolic heart failure                                                                                           | 150.3x       |
|                                | 428.4x      | Combined systolic and diastolic heart failure                                                                     | 150.4x       |
|                                | 428.9       | Heart failure, unspecified                                                                                        | 150.9        |

|                                    |       |                                                |          |
|------------------------------------|-------|------------------------------------------------|----------|
| <b>Peripheral Arterial Disease</b> | 443.9 | Peripheral vascular disease, unspecified       | I73.9    |
| <b>Stroke</b>                      | 433   | Occlusion and stenosis of precerebral arteries | I63, I65 |
|                                    | 434   | Occlusion of cerebral arteries                 | I66      |
|                                    | 434.1 | Cerebral embolism                              |          |
|                                    | 434.9 | Unspecified occlusion                          |          |
|                                    | 436   | Acute but ill-defined cerebrovascular disease  | I67.89   |
|                                    | 438   | Late effects of cerebrovascular disease        | I69      |
| <b>TIA</b>                         | 435   | Transient cerebral ischemia                    | G45      |
| <b>Chronic Kidney Disease</b>      | 585   | Chronic kidney disease (CKD)                   | N18      |
| <b>Heart Failure</b>               | 428   | Heart Failure                                  | I50      |

**Table S3. Definition of Statin side effects.**

|                         | <b>ICD code 9</b> | <b>ICD code 10</b> |
|-------------------------|-------------------|--------------------|
| <b>Hepatitis</b>        | 070, 573.3        | K71.6, K75.9       |
| <b>Transaminitis</b>    | 790.4             | R74.0, R94.5       |
| <b>Myopathy</b>         | 359.4-359.9, 728  | G71, G72, M60, M63 |
| <b>Myositis/Myalgia</b> | 729.1             | M60.9, M79.1       |
| <b>Sleep disorders</b>  | 780.50- 780.59    | G47                |
| <b>Rhabdomyolysis</b>   | 728.88            | M62.82             |

**Table S4. Multivariate MI free survival analysis of patients with thorax, head or neck cancer treated with radiotherapy by the Cox proportional hazard model (age continuous).**

|                            | <b>Hazard Ratio</b> | <b>95% Confidence Interval</b> | <b>P Value</b> |
|----------------------------|---------------------|--------------------------------|----------------|
| <b>Age</b>                 | 1.04                | 1.03-1.06                      | <0.0001        |
| <b>Sex*</b>                | 1.62                | 1.31-20..                      | <.0001         |
| <b>Atrial fibrillation</b> | 0.87                | 0.67-1.13                      | 0.2928         |
| <b>CAD/MI</b>              | 1.69                | 1.04-2.73                      | 0.0334         |
| <b>CVD</b>                 | 1.14                | 0.84-1.56                      | 0.4024         |
| <b>CKD</b>                 | 1.17                | 0.88-1.55                      | 0.2910         |
| <b>Diabetes</b>            | 1.33                | 1.07-1.66                      | 0.0101         |
| <b>Dyslipidemia</b>        | 1.14                | 0.90-1.45                      | 0.2692         |
| <b>Heart Failure</b>       | 1.55                | 1.22-1.96                      | 0.0003         |
| <b>Hypertension</b>        | 0.93                | 0.74-1.18                      | 0.5449         |
| <b>Statin use</b>          | 0.91                | 0.72-1.16                      | 0.4562         |

CAD: coronary artery disease, CVD: cerebrovascular disease, CKD: chronic kidney disease, MI: myocardial infarction

\*Reference female sex

**Figure S1. Adjusted Kaplan Meier Survival Curves for the Outcome of Myocardial Infarction between Statin users and non-Statin users.**

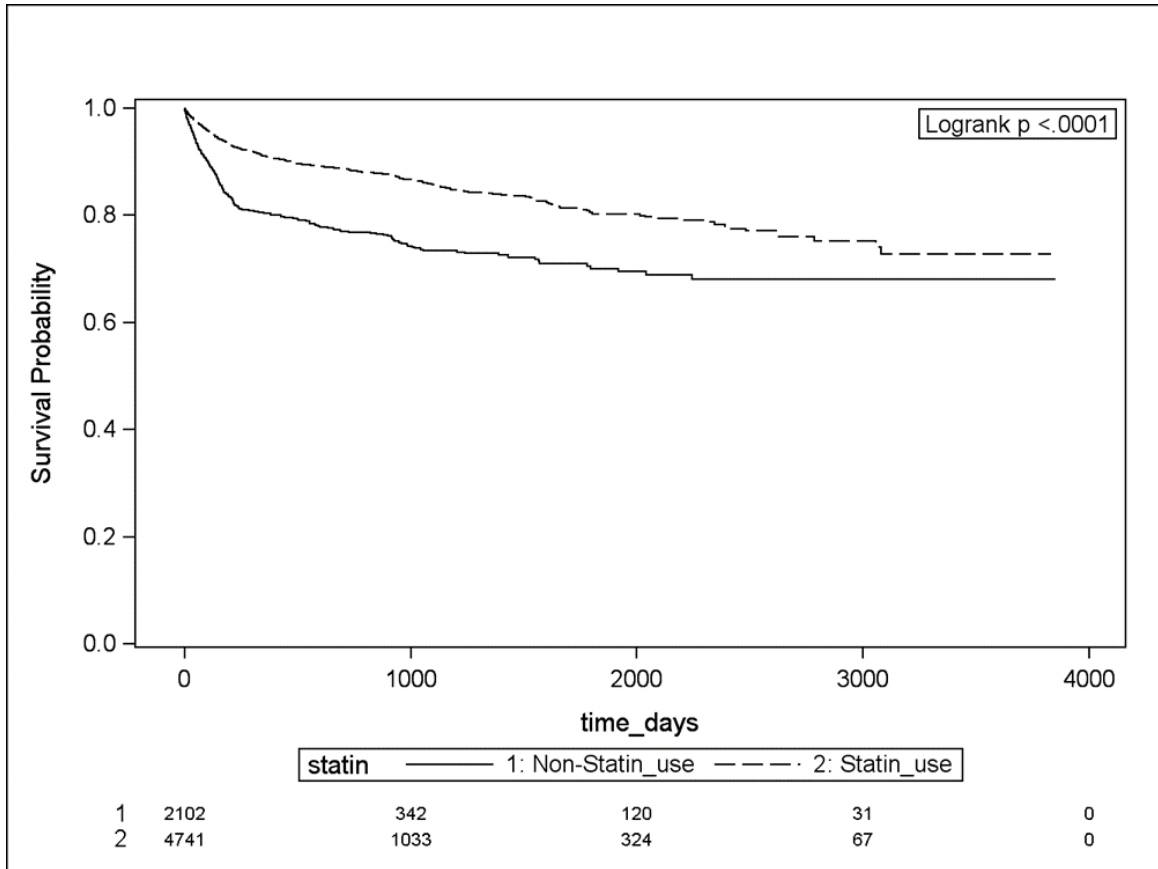

**Figure S2. Forest Plot of Hazard Ratio for the Combined Outcome of Stroke and Myocardial Infarction according to Baseline Covariates.**

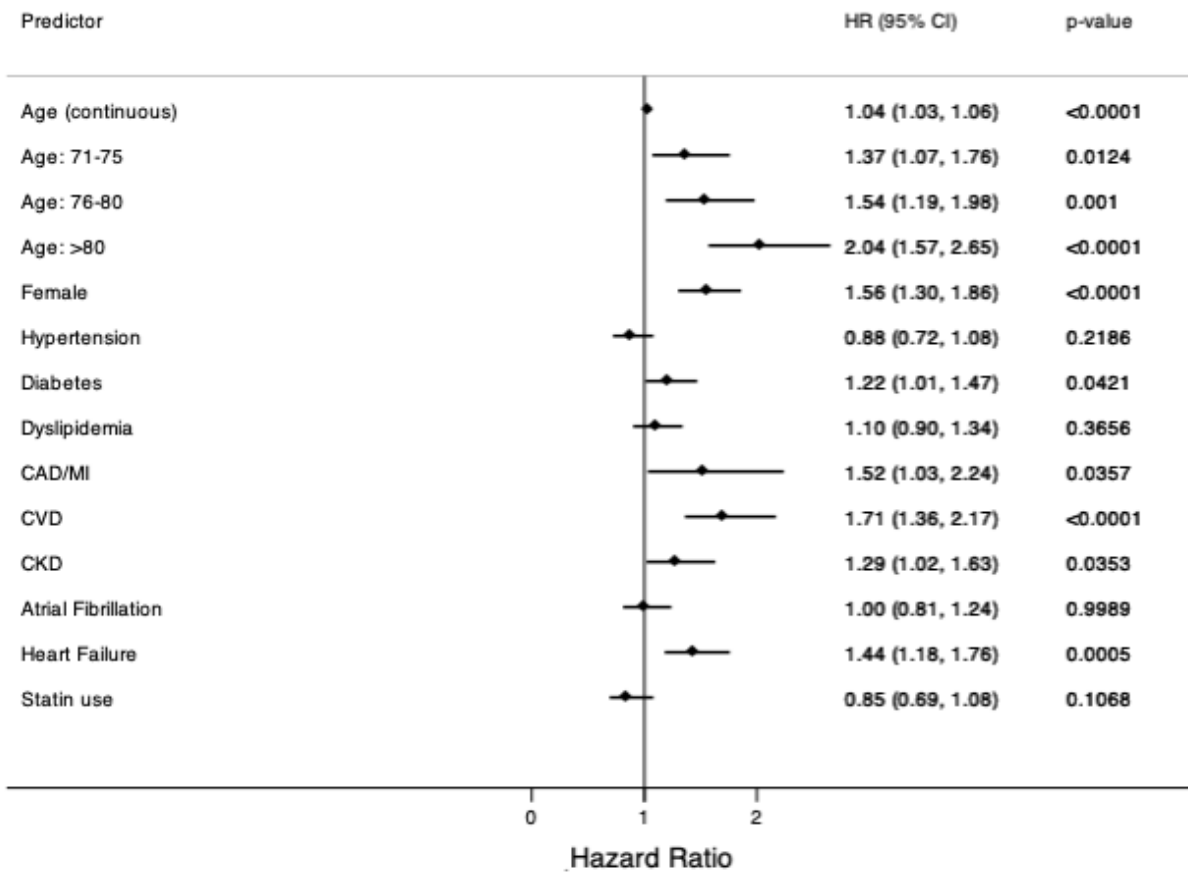

CAD: coronary artery disease, CKD: chronic kidney disease, CVD: cerebrovascular disease, MI: myocardial infarction



**Figure S3. Forest Plot of Hazard Ratio for the Outcome of Stroke according to Baseline Covariates**

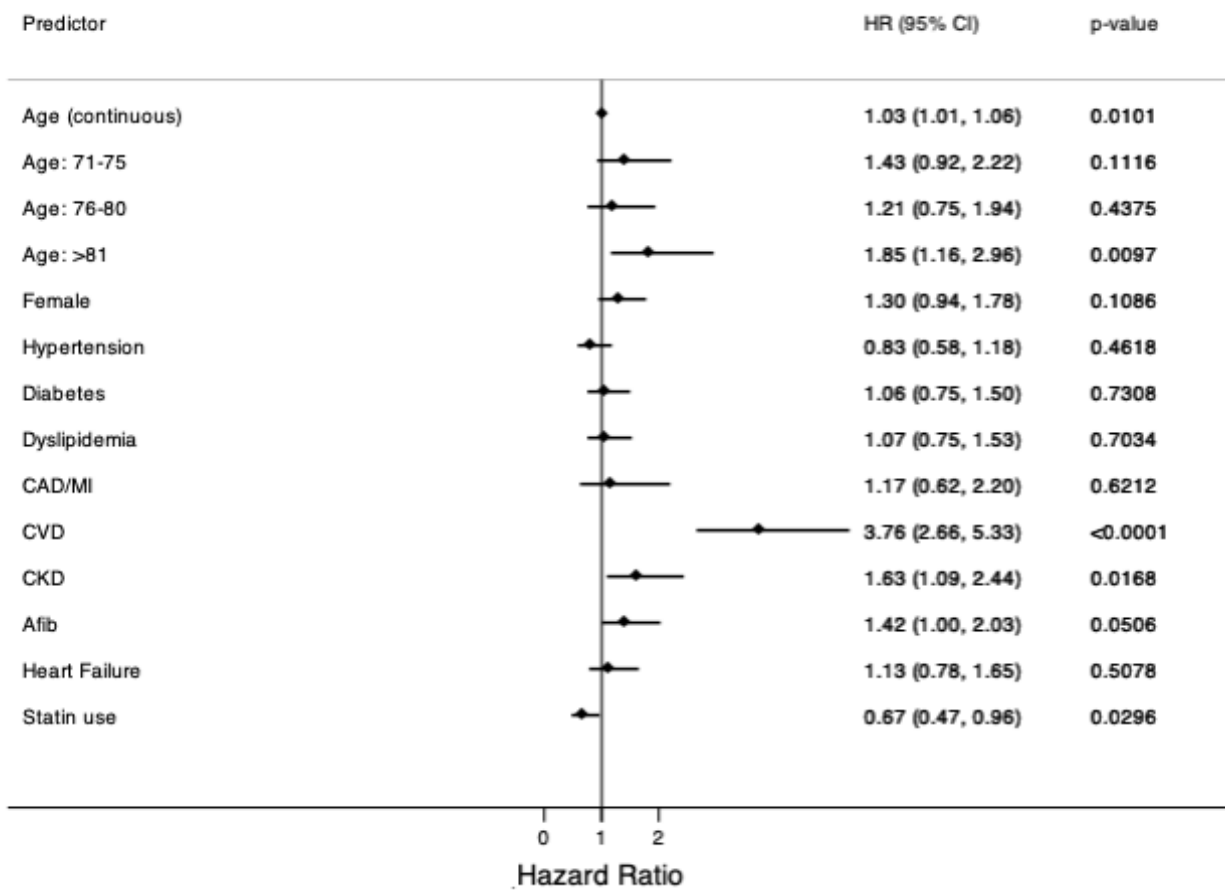

CAD: coronary artery disease, CKD: chronic kidney disease, CVD: cerebrovascular disease, MI: myocardial infarction
